# Supplementary material for: A Novel Dry Treatment for Municipal Solid Waste Incineration Bottom Ash for the Reduction of Salts and Potential Toxic Elements
Source: MDPI journal article supplement (doi:10.3390/ma14113133), 2021-06-07
Supplement: s1 [file s1]

Supplementary Material

# A Novel Dry Treatment for Municipal Solid Waste Incineration Bottom Ash for the Reduction of Salts and Potential Toxic Elements

Marco Abis <sup>1,\*</sup>, Martina Bruno <sup>2</sup>, Franz-Georg Simon <sup>3</sup>, Raul Grönholm <sup>4</sup>, Michel Hoppe <sup>5</sup>, Kerstin Kuchta <sup>1</sup> and Silvia Fiore <sup>2,\*</sup>

<sup>1</sup> SRWM (Sustainable Resource and Waste Management), Hamburg University of Technology, 21079 Hamburg, Germany; kuchta@tuhh.de

<sup>2</sup> DIATI (Department of Engineering for Environment, Land and Infrastructures), Politecnico di Torino, 10129 Torino, Italy; martina.bruno@polito.it

<sup>3</sup> Bundesanstalt für Materialforschung und -Prüfung (BAM), 12200 Berlin, Germany; franz-georg.simon@bam.de

<sup>4</sup> Sysav Utveckling AB, 20025 Malmö, Sweden; Raul.Gronholm@sysav.se

<sup>5</sup> Heidemann Recycling GmbH, 28277 Bremen, Germany; m.hoppe@heidemann-recycling.de

\* Correspondence: marco.abis@tuhh.de (M.A.); silvia.fiore@polito.it (S.F.)

**Citation:** Abis, M.; Bruno, M.; Simon, F.-G.; Grönholm, R.; Hoppe, M.; Kuchta, K.; Fiore, S. A Novel Dry Treatment for Municipal Solid Waste Incineration Bottom Ash for the Reduction of Salts and Potential Toxic Elements. *Materials* **2021**, *14*, 3133. <https://doi.org/10.3390/ma14113133>

**Publisher's Note:** MDPI stays neutral with regard to jurisdictional claims in published maps and institutional affiliations.

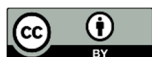

**Copyright:** © 2021 by the authors. Licensee MDPI, Basel, Switzerland. This article is an open access article distributed under the terms and conditions of the Creative Commons Attribution (CC BY) license (<http://creativecommons.org/licenses/by/4.0/>).

**Table SI.** Results of statistical analysis of the correlations among the major and minor compounds analysed in the leachates (samples of bottom ash mineral fraction from PLANT A).

| Data sets           | Pearson Correlation | Significance<br>(Two Tailed) | 95% Confidence Interval<br>(Two Tailed) |        |
|---------------------|---------------------|------------------------------|-----------------------------------------|--------|
|                     |                     |                              | Upper                                   | Lower  |
| Chlorides–Sulphates | 0.852               | 0.000                        | 0.745                                   | 0.916  |
| Chlorides–Al        | 0.310               | 0.046                        | 0.007                                   | 0.561  |
| Chlorides–B         | −0.369              | 0.016                        | −0.605                                  | −0.074 |
| Chlorides–Ba        | 0.950               | 0.000                        | 0.908                                   | 0.973  |
| Chlorides–Be        | 0.280               | 0.073                        | −0.026                                  | 0.538  |
| Chlorides–Ca        | 0.913               | 0.000                        | 0.842                                   | 0.952  |
| Chlorides–Co        | 0.350               | 0.023                        | 0.052                                   | 0.591  |
| Chlorides–Cr        | 0.714               | 0.000                        | 0.523                                   | 0.836  |
| Chlorides–Cu        | 0.925               | 0.000                        | 0.864                                   | 0.959  |
| Chlorides–Fe        | 0.482               | 0.001                        | 0.208                                   | 0.685  |
| Chlorides–K         | 0.996               | 0.000                        | 0.993                                   | 0.998  |
| Chlorides–Li        | 0.928               | 0.000                        | 0.870                                   | 0.961  |
| Chlorides–Mg        | 0.630               | 0.000                        | 0.403                                   | 0.784  |
| Chlorides–Mn        | 0.522               | 0.000                        | 0.259                                   | 0.713  |
| Chlorides–Mo        | 0.922               | 0.000                        | 0.859                                   | 0.958  |
| Chlorides–Na        | 0.994               | 0.000                        | 0.990                                   | 0.997  |
| Chlorides–Ni        |                     |                              |                                         |        |
| Chlorides–Sr        | 0.952               | 0.000                        | 0.912                                   | 0.974  |
| Chlorides–Ti        |                     |                              |                                         |        |
| Chlorides–V         | 0.792               | 0.000                        | 0.643                                   | 0.883  |
| Chlorides–Zn        | 0.247               | 0.114                        | −0.061                                  | 0.513  |
| Sulphates–Al        | −0.104              | 0.511                        | −0.396                                  | 0.206  |
| Sulphates–B         | −0.457              | 0.002                        | −0.668                                  | −0.178 |
| Sulphates–Ba        | 0.762               | 0.000                        | 0.596                                   | 0.866  |
| Sulphates–Be        | 0.177               | 0.262                        | −0.134                                  | 0.456  |
| Sulphates–Ca        | 0.931               | 0.000                        | 0.874                                   | 0.963  |
| Sulphates–Co        | 0.003               | 0.987                        | −0.302                                  | 0.306  |
| Sulphates–Cr        | 0.822               | 0.000                        | 0.690                                   | 0.901  |
| Sulphates–Cu        | 0.920               | 0.000                        | 0.856                                   | 0.957  |
| Sulphates–Fe        | 0.193               | 0.220                        | −0.118                                  | 0.470  |
| Sulphates–K         | 0.808               | 0.000                        | 0.668                                   | 0.893  |
| Sulphates–Li        | 0.935               | 0.000                        | 0.881                                   | 0.965  |
| Sulphates–Mg        | 0.379               | 0.013                        | 0.084                                   | 0.612  |
| Sulphates–Mn        | 0.225               | 0.151                        | −0.084                                  | 0.495  |
| Sulphates–Mo        | 0.907               | 0.000                        | 0.833                                   | 0.949  |
| Sulphates–Na        | 0.800               | 0.000                        | 0.655                                   | 0.888  |
| Sulphates–Ni        |                     |                              |                                         |        |
| Sulphates–Sr        | 0.920               | 0.000                        | 0.855                                   | 0.956  |
| Sulphates–Ti        |                     |                              |                                         |        |
| Sulphates–V         | 0.861               | 0.000                        | 0.754                                   | 0.923  |
| Sulphates–Zn        | 0.268               | 0.087                        | −0.040                                  | 0.528  |
| Al–B                | 0.234               | 0.136                        | −0.075                                  | 0.502  |
| Al–Ba               | 0.436               | 0.004                        | 0.153                                   | 0.654  |
| Al–Be               | 0.225               | 0.153                        | −0.085                                  | 0.495  |
| Al–Ca               | 0.094               | 0.555                        | −0.216                                  | 0.387  |
| Al–Co               | 0.436               | 0.004                        | 0.152                                   | 0.653  |

|       |        |       |        |        |
|-------|--------|-------|--------|--------|
| Al–Cr | −0.172 | 0.275 | −0.453 | 0.139  |
| Al–Cu | 0.023  | 0.883 | −0.282 | 0.325  |
| Al–Fe | 0.640  | 0.000 | 0.417  | 0.790  |
| Al–K  | 0.363  | 0.018 | 0.066  | 0.601  |
| Al–Li | 0.063  | 0.693 | −0.246 | 0.360  |
| Al–Mg | 0.515  | 0.000 | 0.250  | 0.708  |
| Al–Mn | 0.641  | 0.000 | 0.419  | 0.791  |
| Al–Mo | 0.120  | 0.449 | −0.191 | 0.409  |
| Al–Na | 0.383  | 0.012 | 0.090  | 0.615  |
| Al–Ni |        |       |        |        |
| Al–Sr | 0.109  | 0.494 | −0.202 | 0.399  |
| Al–Ti |        |       |        |        |
| Al–V  | −0.100 | 0.530 | −0.392 | 0.211  |
| Al–Zn | 0.075  | 0.636 | −0.234 | 0.371  |
| B–Ba  | −0.286 | 0.066 | −0.543 | 0.020  |
| B–Be  | −0.125 | 0.431 | −0.413 | 0.186  |
| B–Ca  | −0.304 | 0.050 | −0.557 | −0.001 |
| B–Co  | 0.160  | 0.311 | −0.151 | 0.443  |
| B–Cr  | −0.107 | 0.500 | −0.398 | 0.203  |
| B–Cu  | −0.383 | 0.012 | −0.615 | −0.089 |
| B–Fe  | −0.093 | 0.556 | −0.386 | 0.217  |
| B–K   | −0.354 | 0.022 | −0.594 | −0.056 |
| B–Li  | −0.384 | 0.012 | −0.616 | −0.090 |
| B–Mg  | 0.111  | 0.486 | −0.200 | 0.401  |
| B–Mn  | −0.110 | 0.488 | −0.401 | 0.201  |
| B–Mo  | −0.357 | 0.020 | −0.596 | −0.060 |
| B–Na  | −0.356 | 0.021 | −0.595 | −0.058 |
| B–Ni  |        |       |        |        |
| B–Sr  | −0.384 | 0.012 | −0.616 | −0.091 |
| B–Ti  |        |       |        |        |
| B–V   | −0.215 | 0.172 | −0.487 | 0.095  |
| B–Zn  | 0.002  | 0.989 | −0.302 | 0.306  |
| Ba–Be | 0.274  | 0.079 | −0.032 | 0.534  |
| Ba–Ca | 0.903  | 0.000 | 0.826  | 0.947  |
| Ba–Co | 0.364  | 0.018 | 0.068  | 0.602  |
| Ba–Cr | 0.661  | 0.000 | 0.447  | 0.804  |
| Ba–Cu | 0.844  | 0.000 | 0.726  | 0.914  |
| Ba–Fe | 0.615  | 0.000 | 0.383  | 0.774  |
| Ba–K  | 0.969  | 0.000 | 0.943  | 0.983  |
| Ba–Li | 0.890  | 0.000 | 0.804  | 0.940  |
| Ba–Mg | 0.679  | 0.000 | 0.473  | 0.815  |
| Ba–Mn | 0.635  | 0.000 | 0.411  | 0.787  |
| Ba–Mo | 0.903  | 0.000 | 0.826  | 0.947  |
| Ba–Na | 0.970  | 0.000 | 0.945  | 0.984  |
| Ba–Ni |        |       |        |        |
| Ba–Sr | 0.922  | 0.000 | 0.859  | 0.958  |
| Ba–Ti |        |       |        |        |
| Ba–V  | 0.780  | 0.000 | 0.624  | 0.876  |
| Ba–Zn | 0.276  | 0.077 | −0.030 | 0.535  |
| Be–Ca | 0.226  | 0.150 | −0.084 | 0.496  |
| Be–Co | −0.069 | 0.664 | −0.365 | 0.240  |

|       |        |       |        |       |
|-------|--------|-------|--------|-------|
| Be–Cr | 0.092  | 0.562 | −0.218 | 0.385 |
| Be–Cu | 0.244  | 0.120 | −0.065 | 0.510 |
| Be–Fe | 0.079  | 0.617 | −0.230 | 0.374 |
| Be–K  | 0.279  | 0.074 | −0.027 | 0.537 |
| Be–Li | 0.237  | 0.131 | −0.072 | 0.504 |
| Be–Mg | −0.013 | 0.933 | −0.316 | 0.292 |
| Be–Mn | 0.054  | 0.736 | −0.254 | 0.352 |
| Be–Mo | 0.246  | 0.117 | −0.063 | 0.511 |
| Be–Na | 0.285  | 0.067 | −0.020 | 0.542 |
| Be–Ni |        |       |        |       |
| Be–Sr | 0.238  | 0.128 | −0.071 | 0.506 |
| Be–Ti |        |       |        |       |
| Be–V  | 0.100  | 0.527 | −0.210 | 0.392 |
| Be–Zn | −0.173 | 0.272 | −0.453 | 0.138 |
| Ca–Co | 0.145  | 0.359 | −0.166 | 0.430 |
| Ca–Cr | 0.882  | 0.000 | 0.789  | 0.935 |
| Ca–Cu | 0.957  | 0.000 | 0.921  | 0.977 |
| Ca–Fe | 0.316  | 0.041 | 0.014  | 0.566 |
| Ca–K  | 0.910  | 0.000 | 0.839  | 0.951 |
| Ca–Li | 0.987  | 0.000 | 0.975  | 0.993 |
| Ca–Mg | 0.500  | 0.001 | 0.231  | 0.698 |
| Ca–Mn | 0.353  | 0.022 | 0.055  | 0.593 |
| Ca–Mo | 0.980  | 0.000 | 0.962  | 0.989 |
| Ca–Na | 0.904  | 0.000 | 0.828  | 0.948 |
| Ca–Ni |        |       |        |       |
| Ca–Sr | 0.987  | 0.000 | 0.976  | 0.993 |
| Ca–Ti |        |       |        |       |
| Ca–V  | 0.931  | 0.000 | 0.875  | 0.963 |
| Ca–Zn | 0.286  | 0.066 | −0.020 | 0.543 |
| Co–Cr | −0.021 | 0.893 | −0.323 | 0.284 |
| Co–Cu | 0.140  | 0.377 | −0.171 | 0.426 |
| Co–Fe | 0.551  | 0.000 | 0.297  | 0.732 |
| Co–K  | 0.359  | 0.020 | 0.062  | 0.598 |
| Co–Li | 0.126  | 0.426 | −0.185 | 0.414 |
| Co–Mg | 0.656  | 0.000 | 0.440  | 0.800 |
| Co–Mn | 0.572  | 0.000 | 0.325  | 0.746 |
| Co–Mo | 0.177  | 0.263 | −0.134 | 0.456 |
| Co–Na | 0.361  | 0.019 | 0.065  | 0.599 |
| Co–Ni |        |       |        |       |
| Co–Sr | 0.189  | 0.232 | −0.122 | 0.466 |
| Co–Ti |        |       |        |       |
| Co–V  | 0.153  | 0.333 | −0.158 | 0.437 |
| Co–Zn | 0.149  | 0.347 | −0.163 | 0.433 |
| Cr–Cu | 0.881  | 0.000 | 0.787  | 0.934 |
| Cr–Fe | −0.014 | 0.929 | −0.317 | 0.291 |
| Cr–K  | 0.696  | 0.000 | 0.497  | 0.825 |
| Cr–Li | 0.863  | 0.000 | 0.758  | 0.924 |
| Cr–Mg | 0.327  | 0.034 | 0.026  | 0.574 |
| Cr–Mn | 0.013  | 0.937 | −0.292 | 0.315 |
| Cr–Mo | 0.836  | 0.000 | 0.713  | 0.909 |
| Cr–Na | 0.681  | 0.000 | 0.475  | 0.816 |

|       |       |       |        |       |
|-------|-------|-------|--------|-------|
| Cr–Ni |       |       |        |       |
| Cr–Sr | 0.838 | 0.000 | 0.717  | 0.910 |
| Cr–Ti |       |       |        |       |
| Cr–V  | 0.882 | 0.000 | 0.791  | 0.935 |
| Cr–Zn | 0.239 | 0.127 | −0.070 | 0.506 |
| Cu–Fe | 0.190 | 0.229 | −0.121 | 0.467 |
| Cu–K  | 0.910 | 0.000 | 0.837  | 0.951 |
| Cu–Li | 0.978 | 0.000 | 0.959  | 0.988 |
| Cu–Mg | 0.425 | 0.005 | 0.139  | 0.645 |
| Cu–Mn | 0.230 | 0.143 | −0.079 | 0.499 |
| Cu–Mo | 0.950 | 0.000 | 0.908  | 0.973 |
| Cu–Na | 0.902 | 0.000 | 0.825  | 0.947 |
| Cu–Ni |       |       |        |       |
| Cu–Sr | 0.966 | 0.000 | 0.937  | 0.982 |
| Cu–Ti |       |       |        |       |
| Cu–V  | 0.891 | 0.000 | 0.805  | 0.940 |
| Cu–Zn | 0.213 | 0.175 | −0.097 | 0.486 |
| Fe–K  | 0.519 | 0.000 | 0.256  | 0.711 |
| Fe–Li | 0.274 | 0.079 | −0.033 | 0.534 |
| Fe–Mg | 0.691 | 0.000 | 0.490  | 0.822 |
| Fe–Mn | 0.863 | 0.000 | 0.758  | 0.924 |
| Fe–Mo | 0.345 | 0.025 | 0.045  | 0.587 |
| Fe–Na | 0.530 | 0.000 | 0.269  | 0.718 |
| Fe–Ni |       |       |        |       |
| Fe–Sr | 0.351 | 0.023 | 0.053  | 0.592 |
| Fe–Ti |       |       |        |       |
| Fe–V  | 0.185 | 0.241 | −0.126 | 0.463 |
| Fe–Zn | 0.238 | 0.129 | −0.071 | 0.505 |
| K–Li  | 0.923 | 0.000 | 0.861  | 0.958 |
| K–Mg  | 0.642 | 0.000 | 0.420  | 0.791 |
| K–Mn  | 0.553 | 0.000 | 0.299  | 0.733 |
| K–Mo  | 0.918 | 0.000 | 0.852  | 0.955 |
| K–Na  | 0.999 | 0.000 | 0.999  | 1.000 |
| K–Ni  |       |       |        |       |
| K–Sr  | 0.947 | 0.000 | 0.903  | 0.971 |
| K–Ti  |       |       |        |       |
| K–V   | 0.786 | 0.000 | 0.633  | 0.880 |
| K–Zn  | 0.258 | 0.099 | −0.050 | 0.521 |
| Li–Mg | 0.444 | 0.003 | 0.162  | 0.659 |
| Li–Mn | 0.312 | 0.044 | 0.009  | 0.563 |
| Li–Mo | 0.974 | 0.000 | 0.951  | 0.986 |
| Li–Na | 0.917 | 0.000 | 0.850  | 0.955 |
| Li–Ni |       |       |        |       |
| Li–Sr | 0.992 | 0.000 | 0.984  | 0.996 |
| Li–Ti |       |       |        |       |
| Li–V  | 0.916 | 0.000 | 0.849  | 0.954 |
| Li–Zn | 0.262 | 0.094 | −0.046 | 0.524 |
| Mg–Mn | 0.728 | 0.000 | 0.545  | 0.845 |
| Mg–Mo | 0.493 | 0.001 | 0.222  | 0.693 |
| Mg–Na | 0.638 | 0.000 | 0.415  | 0.789 |
| Mg–Ni |       |       |        |       |

---

|       |       |       |        |       |
|-------|-------|-------|--------|-------|
| Mg–Sr | 0.515 | 0.000 | 0.250  | 0.708 |
| Mg–Ti |       |       |        |       |
| Mg–V  | 0.405 | 0.008 | 0.115  | 0.631 |
| Mg–Zn | 0.267 | 0.087 | −0.040 | 0.528 |
| Mn–Mo | 0.381 | 0.013 | 0.087  | 0.614 |
| Mn–Na | 0.567 | 0.000 | 0.318  | 0.743 |
| Mn–Ni |       |       |        |       |
| Mn–Sr | 0.391 | 0.010 | 0.099  | 0.621 |
| Mn–Ti |       |       |        |       |
| Mn–V  | 0.194 | 0.219 | −0.117 | 0.470 |
| Mn–Zn | 0.242 | 0.123 | −0.067 | 0.508 |
| Mo–Na | 0.914 | 0.000 | 0.845  | 0.953 |
| Mo–Ni |       |       |        |       |
| Mo–Sr | 0.979 | 0.000 | 0.962  | 0.989 |
| Mo–Ti |       |       |        |       |
| Mo–V  | 0.898 | 0.000 | 0.817  | 0.944 |
| Mo–Zn | 0.267 | 0.088 | −0.040 | 0.528 |
| Na–Ni |       |       |        |       |
| Na–Sr | 0.941 | 0.000 | 0.893  | 0.968 |
| Na–Ti |       |       |        |       |
| Na–V  | 0.773 | 0.000 | 0.613  | 0.872 |
| Na–Zn | 0.253 | 0.105 | −0.055 | 0.518 |
| Ni–Sr |       |       |        |       |
| Ni–Ti |       |       |        |       |
| Ni–V  |       |       |        |       |
| Ni–Zn |       |       |        |       |
| Sr–Ti |       |       |        |       |
| Sr–V  | 0.910 | 0.000 | 0.838  | 0.951 |
| Sr–Zn | 0.275 | 0.078 | −0.032 | 0.534 |
| Ti–V  |       |       |        |       |
| Ti–Zn |       |       |        |       |
| V–Zn  | 0.231 | 0.141 | −0.079 | 0.500 |

---

**Table SII.** Results of statistical analysis of the correlations among the major and minor compounds analysed in the leachates (samples of bottom ash mineral fraction from PLANT B).

| Data sets           | Pearson Correlation | Significance<br>(Two Tailed) | 95% Confidence Interval<br>(Two Tailed) |        |
|---------------------|---------------------|------------------------------|-----------------------------------------|--------|
|                     |                     |                              | Lower                                   | Upper  |
| Chlorides–Sulphates | 0.922               | 0.000                        | 0.871                                   | 0.953  |
| Chlorides–TOC       | 0.975               | 0.000                        | 0.959                                   | 0.985  |
| Chlorides–Al        | −0.585              | 0.000                        | −0.732                                  | −0.387 |
| Chlorides–B         | 0.707               | 0.000                        | 0.551                                   | 0.815  |
| Chlorides–Ba        | 0.970               | 0.000                        | 0.950                                   | 0.982  |
| Chlorides–Be        | 0.191               | 0.147                        | −0.068                                  | 0.426  |
| Chlorides–Ca        | 0.842               | 0.000                        | 0.746                                   | 0.903  |
| Chlorides–Co        | −0.120              | 0.366                        | −0.365                                  | 0.141  |
| Chlorides–Cr        | 0.783               | 0.000                        | 0.659                                   | 0.866  |
| Chlorides–Cu        | 0.853               | 0.000                        | 0.764                                   | 0.910  |
| Chlorides–Fe        | 0.359               | 0.005                        | 0.113                                   | 0.563  |
| Chlorides–K         | 0.993               | 0.000                        | 0.988                                   | 0.996  |
| Chlorides–Li        | 0.701               | 0.000                        | 0.543                                   | 0.812  |
| Chlorides–Mg        | 0.807               | 0.000                        | 0.695                                   | 0.881  |
| Chlorides–Mn        | 0.632               | 0.000                        | 0.449                                   | 0.764  |
| Chlorides–Mo        | 0.968               | 0.000                        | 0.946                                   | 0.981  |
| Chlorides–Na        | 0.995               | 0.000                        | 0.991                                   | 0.997  |
| Chlorides–Ni        | −0.019              | 0.884                        | −0.274                                  | 0.238  |
| Chlorides–Sr        | 0.879               | 0.000                        | 0.804                                   | 0.927  |
| Chlorides–Ti        | −0.012              | 0.927                        | −0.267                                  | 0.245  |
| Chlorides–V         | 0.234               | 0.074                        | −0.023                                  | 0.463  |
| Chlorides–Zn        | 0.177               | 0.179                        | −0.082                                  | 0.415  |
| Sulphates–TOC       | 0.931               | 0.000                        | 0.886                                   | 0.959  |
| Sulphates–Al        | −0.511              | 0.000                        | −0.679                                  | −0.294 |
| Sulphates–B         | 0.562               | 0.000                        | 0.357                                   | 0.715  |
| Sulphates–Ba        | 0.906               | 0.000                        | 0.846                                   | 0.943  |
| Sulphates–Be        | 0.192               | 0.146                        | −0.068                                  | 0.427  |
| Sulphates–Ca        | 0.976               | 0.000                        | 0.960                                   | 0.986  |
| Sulphates–Co        | −0.294              | 0.024                        | −0.511                                  | −0.041 |
| Sulphates–Cr        | 0.716               | 0.000                        | 0.563                                   | 0.822  |
| Sulphates–Cu        | 0.895               | 0.000                        | 0.828                                   | 0.936  |
| Sulphates–Fe        | 0.203               | 0.122                        | −0.056                                  | 0.437  |
| Sulphates–K         | 0.942               | 0.000                        | 0.905                                   | 0.965  |
| Sulphates–Li        | 0.872               | 0.000                        | 0.792                                   | 0.922  |
| Sulphates–Mg        | 0.691               | 0.000                        | 0.529                                   | 0.805  |
| Sulphates–Mn        | 0.493               | 0.000                        | 0.272                                   | 0.665  |
| Sulphates–Mo        | 0.928               | 0.000                        | 0.882                                   | 0.957  |
| Sulphates–Na        | 0.929               | 0.000                        | 0.884                                   | 0.958  |
| Sulphates–Ni        | −0.221              | 0.092                        | −0.452                                  | 0.037  |
| Sulphates–Sr        | 0.984               | 0.000                        | 0.973                                   | 0.991  |
| Sulphates–Ti        | −0.042              | 0.754                        | −0.295                                  | 0.217  |
| Sulphates–V         | 0.136               | 0.305                        | −0.125                                  | 0.379  |
| Sulphates–Zn        | 0.240               | 0.067                        | −0.017                                  | 0.468  |
| TOC–Al              | −0.484              | 0.000                        | −0.658                                  | −0.260 |
| TOC–B               | 0.679               | 0.000                        | 0.512                                   | 0.797  |
| TOC–Ba              | 0.923               | 0.000                        | 0.874                                   | 0.954  |

|        |        |       |        |        |
|--------|--------|-------|--------|--------|
| TOC–Be | 0.208  | 0.113 | −0.050 | 0.441  |
| TOC–Ca | 0.860  | 0.000 | 0.774  | 0.914  |
| TOC–Co | −0.187 | 0.156 | −0.423 | 0.072  |
| TOC–Cr | 0.858  | 0.000 | 0.772  | 0.914  |
| TOC–Cu | 0.900  | 0.000 | 0.836  | 0.939  |
| TOC–Fe | 0.270  | 0.039 | 0.015  | 0.492  |
| TOC–K  | 0.983  | 0.000 | 0.972  | 0.990  |
| TOC–Li | 0.719  | 0.000 | 0.567  | 0.823  |
| TOC–Mg | 0.726  | 0.000 | 0.577  | 0.828  |
| TOC–Mn | 0.576  | 0.000 | 0.375  | 0.725  |
| TOC–Mo | 0.949  | 0.000 | 0.916  | 0.970  |
| TOC–Na | 0.980  | 0.000 | 0.967  | 0.988  |
| TOC–Ni | −0.122 | 0.359 | −0.366 | 0.139  |
| TOC–Sr | 0.900  | 0.000 | 0.838  | 0.940  |
| TOC–Ti | −0.066 | 0.619 | −0.317 | 0.193  |
| TOC–V  | 0.188  | 0.153 | −0.071 | 0.424  |
| TOC–Zn | 0.177  | 0.179 | −0.083 | 0.415  |
| Al–B   | −0.556 | 0.000 | −0.711 | −0.350 |
| Al–Ba  | −0.649 | 0.000 | −0.776 | −0.471 |
| Al–Be  | −0.178 | 0.178 | −0.415 | 0.082  |
| Al–Ca  | −0.440 | 0.000 | −0.625 | −0.207 |
| Al–Co  | −0.032 | 0.813 | −0.285 | 0.226  |
| Al–Cr  | −0.200 | 0.128 | −0.434 | 0.059  |
| Al–Cu  | −0.355 | 0.006 | −0.560 | −0.108 |
| Al–Fe  | −0.235 | 0.073 | −0.463 | 0.022  |
| Al–K   | −0.576 | 0.000 | −0.725 | −0.375 |
| Al–Li  | −0.333 | 0.010 | −0.543 | −0.084 |
| Al–Mg  | −0.551 | 0.000 | −0.707 | −0.343 |
| Al–Mn  | −0.399 | 0.002 | −0.594 | −0.159 |
| Al–Mo  | −0.606 | 0.000 | −0.747 | −0.415 |
| Al–Na  | −0.589 | 0.000 | −0.734 | −0.392 |
| Al–Ni  | −0.401 | 0.002 | −0.596 | −0.161 |
| Al–Sr  | −0.452 | 0.000 | −0.635 | −0.222 |
| Al–Ti  | −0.100 | 0.451 | −0.347 | 0.160  |
| Al–V   | −0.375 | 0.003 | −0.576 | −0.132 |
| Al–Zn  | −0.261 | 0.046 | −0.485 | −0.005 |
| B–Ba   | 0.708  | 0.000 | 0.553  | 0.816  |
| B–Be   | 0.088  | 0.508 | −0.172 | 0.336  |
| B–Ca   | 0.449  | 0.000 | 0.218  | 0.632  |
| B–Co   | −0.130 | 0.328 | −0.373 | 0.131  |
| B–Cr   | 0.683  | 0.000 | 0.517  | 0.799  |
| B–Cu   | 0.537  | 0.000 | 0.326  | 0.697  |
| B–Fe   | 0.477  | 0.000 | 0.252  | 0.653  |
| B–K    | 0.712  | 0.000 | 0.558  | 0.819  |
| B–Li   | 0.265  | 0.042 | 0.010  | 0.488  |
| B–Mg   | 0.680  | 0.000 | 0.513  | 0.797  |
| B–Mn   | 0.519  | 0.000 | 0.303  | 0.684  |
| B–Mo   | 0.674  | 0.000 | 0.505  | 0.793  |
| B–Na   | 0.726  | 0.000 | 0.578  | 0.828  |
| B–Ni   | 0.303  | 0.020 | 0.051  | 0.519  |
| B–Sr   | 0.526  | 0.000 | 0.312  | 0.689  |



|       |        |       |        |        |
|-------|--------|-------|--------|--------|
| B–Ti  | −0.018 | 0.891 | −0.273 | 0.239  |
| B–V   | 0.367  | 0.004 | 0.122  | 0.569  |
| B–Zn  | −0.062 | 0.641 | −0.313 | 0.197  |
| Ba–Be | 0.179  | 0.176 | −0.081 | 0.416  |
| Ba–Ca | 0.843  | 0.000 | 0.749  | 0.904  |
| Ba–Co | −0.104 | 0.435 | −0.350 | 0.157  |
| Ba–Cr | 0.669  | 0.000 | 0.498  | 0.790  |
| Ba–Cu | 0.797  | 0.000 | 0.680  | 0.875  |
| Ba–Fe | 0.435  | 0.001 | 0.202  | 0.622  |
| Ba–K  | 0.967  | 0.000 | 0.944  | 0.980  |
| Ba–Li | 0.721  | 0.000 | 0.571  | 0.825  |
| Ba–Mg | 0.856  | 0.000 | 0.768  | 0.912  |
| Ba–Mn | 0.660  | 0.000 | 0.487  | 0.784  |
| Ba–Mo | 0.947  | 0.000 | 0.912  | 0.968  |
| Ba–Na | 0.970  | 0.000 | 0.950  | 0.982  |
| Ba–Ni | 0.021  | 0.874 | −0.236 | 0.276  |
| Ba–Sr | 0.872  | 0.000 | 0.793  | 0.922  |
| Ba–Ti | −0.005 | 0.972 | −0.260 | 0.252  |
| Ba–V  | 0.208  | 0.113 | −0.051 | 0.441  |
| Ba–Zn | 0.205  | 0.120 | −0.054 | 0.438  |
| Be–Ca | 0.179  | 0.175 | −0.081 | 0.416  |
| Be–Co | 0.165  | 0.211 | −0.095 | 0.404  |
| Be–Cr | 0.188  | 0.153 | −0.071 | 0.424  |
| Be–Cu | 0.243  | 0.063 | −0.014 | 0.470  |
| Be–Fe | 0.189  | 0.152 | −0.071 | 0.424  |
| Be–K  | 0.205  | 0.120 | −0.054 | 0.438  |
| Be–Li | 0.214  | 0.104 | −0.045 | 0.446  |
| Be–Mg | 0.197  | 0.134 | −0.062 | 0.432  |
| Be–Mn | 0.191  | 0.148 | −0.069 | 0.426  |
| Be–Mo | 0.238  | 0.070 | −0.019 | 0.466  |
| Be–Na | 0.209  | 0.112 | −0.050 | 0.442  |
| Be–Ni | −0.095 | 0.472 | −0.343 | 0.165  |
| Be–Sr | 0.194  | 0.141 | −0.066 | 0.429  |
| Be–Ti | 0.014  | 0.914 | −0.243 | 0.270  |
| Be–V  | 0.037  | 0.778 | −0.221 | 0.291  |
| Be–Zn | 0.319  | 0.014 | 0.068  | 0.532  |
| Ca–Co | −0.336 | 0.009 | −0.545 | −0.087 |
| Ca–Cr | 0.625  | 0.000 | 0.439  | 0.759  |
| Ca–Cu | 0.867  | 0.000 | 0.785  | 0.919  |
| Ca–Fe | 0.129  | 0.329 | −0.131 | 0.373  |
| Ca–K  | 0.874  | 0.000 | 0.796  | 0.924  |
| Ca–Li | 0.923  | 0.000 | 0.874  | 0.954  |
| Ca–Mg | 0.624  | 0.000 | 0.438  | 0.759  |
| Ca–Mn | 0.423  | 0.001 | 0.187  | 0.613  |
| Ca–Mo | 0.860  | 0.000 | 0.774  | 0.915  |
| Ca–Na | 0.854  | 0.000 | 0.765  | 0.911  |
| Ca–Ni | −0.304 | 0.019 | −0.520 | −0.052 |
| Ca–Sr | 0.989  | 0.000 | 0.981  | 0.993  |
| Ca–Ti | −0.074 | 0.577 | −0.324 | 0.186  |
| Ca–V  | 0.077  | 0.560 | −0.182 | 0.327  |
| Ca–Zn | 0.269  | 0.039 | 0.014  | 0.491  |

|       |        |       |        |        |
|-------|--------|-------|--------|--------|
| Co–Cr | −0.243 | 0.063 | −0.470 | 0.014  |
| Co–Cu | −0.332 | 0.010 | −0.542 | −0.083 |
| Co–Fe | 0.196  | 0.136 | −0.063 | 0.431  |
| Co–K  | −0.164 | 0.214 | −0.403 | 0.096  |
| Co–Li | −0.305 | 0.019 | −0.520 | −0.053 |
| Co–Mg | 0.145  | 0.273 | −0.115 | 0.387  |
| Co–Mn | 0.266  | 0.041 | 0.011  | 0.489  |
| Co–Mo | −0.177 | 0.181 | −0.414 | 0.083  |
| Co–Na | −0.143 | 0.279 | −0.385 | 0.117  |
| Co–Ni | 0.203  | 0.124 | −0.056 | 0.436  |
| Co–Sr | −0.334 | 0.010 | −0.543 | −0.085 |
| Co–Ti | 0.038  | 0.773 | −0.220 | 0.292  |
| Co–V  | 0.053  | 0.691 | −0.206 | 0.305  |
| Co–Zn | −0.012 | 0.927 | −0.267 | 0.245  |
| Cr–Cu | 0.847  | 0.000 | 0.755  | 0.907  |
| Cr–Fe | 0.218  | 0.097 | −0.040 | 0.449  |
| Cr–K  | 0.804  | 0.000 | 0.690  | 0.879  |
| Cr–Li | 0.459  | 0.000 | 0.230  | 0.640  |
| Cr–Mg | 0.547  | 0.000 | 0.338  | 0.704  |
| Cr–Mn | 0.470  | 0.000 | 0.243  | 0.648  |
| Cr–Mo | 0.759  | 0.000 | 0.625  | 0.850  |
| Cr–Na | 0.801  | 0.000 | 0.685  | 0.877  |
| Cr–Ni | −0.141 | 0.286 | −0.383 | 0.119  |
| Cr–Sr | 0.696  | 0.000 | 0.536  | 0.808  |
| Cr–Ti | −0.129 | 0.331 | −0.373 | 0.132  |
| Cr–V  | 0.131  | 0.324 | −0.130 | 0.374  |
| Cr–Zn | −0.005 | 0.969 | −0.261 | 0.251  |
| Cu–Fe | 0.132  | 0.318 | −0.128 | 0.376  |
| Cu–K  | 0.884  | 0.000 | 0.811  | 0.929  |
| Cu–Li | 0.730  | 0.000 | 0.583  | 0.831  |
| Cu–Mg | 0.600  | 0.000 | 0.407  | 0.742  |
| Cu–Mn | 0.431  | 0.001 | 0.197  | 0.619  |
| Cu–Mo | 0.856  | 0.000 | 0.768  | 0.912  |
| Cu–Na | 0.870  | 0.000 | 0.789  | 0.921  |
| Cu–Ni | −0.232 | 0.078 | −0.460 | 0.026  |
| Cu–Sr | 0.898  | 0.000 | 0.834  | 0.938  |
| Cu–Ti | −0.047 | 0.722 | −0.300 | 0.211  |
| Cu–V  | 0.110  | 0.407 | −0.150 | 0.356  |
| Cu–Zn | 0.203  | 0.123 | −0.056 | 0.436  |
| Fe–K  | 0.328  | 0.011 | 0.079  | 0.539  |
| Fe–Li | 0.081  | 0.543 | −0.179 | 0.330  |
| Fe–Mg | 0.715  | 0.000 | 0.562  | 0.821  |
| Fe–Mn | 0.694  | 0.000 | 0.533  | 0.807  |
| Fe–Mo | 0.324  | 0.012 | 0.074  | 0.535  |
| Fe–Na | 0.348  | 0.007 | 0.101  | 0.555  |
| Fe–Ni | 0.148  | 0.263 | −0.112 | 0.389  |
| Fe–Sr | 0.159  | 0.229 | −0.101 | 0.399  |
| Fe–Ti | 0.028  | 0.835 | −0.230 | 0.282  |
| Fe–V  | 0.014  | 0.917 | −0.243 | 0.269  |
| Fe–Zn | −0.107 | 0.420 | −0.353 | 0.153  |
| K–Li  | 0.737  | 0.000 | 0.593  | 0.835  |

|       |        |       |        |        |
|-------|--------|-------|--------|--------|
| K–Mg  | 0.791  | 0.000 | 0.671  | 0.871  |
| K–Mn  | 0.612  | 0.000 | 0.422  | 0.751  |
| K–Mo  | 0.972  | 0.000 | 0.953  | 0.983  |
| K–Na  | 0.999  | 0.000 | 0.998  | 0.999  |
| K–Ni  | −0.052 | 0.694 | −0.304 | 0.207  |
| K–Sr  | 0.910  | 0.000 | 0.852  | 0.946  |
| K–Ti  | −0.031 | 0.815 | −0.285 | 0.227  |
| K–V   | 0.223  | 0.090 | −0.035 | 0.453  |
| K–Zn  | 0.192  | 0.146 | −0.068 | 0.427  |
| Li–Mg | 0.513  | 0.000 | 0.296  | 0.680  |
| Li–Mn | 0.359  | 0.005 | 0.113  | 0.563  |
| Li–Mo | 0.775  | 0.000 | 0.647  | 0.860  |
| Li–Na | 0.715  | 0.000 | 0.562  | 0.821  |
| Li–Ni | −0.323 | 0.013 | −0.535 | −0.073 |
| Li–Sr | 0.882  | 0.000 | 0.808  | 0.928  |
| Li–Ti | −0.040 | 0.763 | −0.293 | 0.218  |
| Li–V  | −0.046 | 0.727 | −0.299 | 0.212  |
| Li–Zn | 0.256  | 0.050 | 0.000  | 0.481  |
| Mg–Mn | 0.843  | 0.000 | 0.748  | 0.904  |
| Mg–Mo | 0.769  | 0.000 | 0.638  | 0.856  |
| Mg–Na | 0.801  | 0.000 | 0.686  | 0.877  |
| Mg–Ni | 0.088  | 0.507 | −0.172 | 0.337  |
| Mg–Sr | 0.656  | 0.000 | 0.481  | 0.781  |
| Mg–Ti | −0.032 | 0.812 | −0.285 | 0.226  |
| Mg–V  | 0.168  | 0.204 | −0.092 | 0.406  |
| Mg–Zn | 0.093  | 0.485 | −0.167 | 0.341  |
| Mn–Mo | 0.611  | 0.000 | 0.421  | 0.750  |
| Mn–Na | 0.627  | 0.000 | 0.442  | 0.761  |
| Mn–Ni | 0.035  | 0.794 | −0.223 | 0.288  |
| Mn–Sr | 0.458  | 0.000 | 0.228  | 0.639  |
| Mn–Ti | −0.038 | 0.773 | −0.292 | 0.220  |
| Mn–V  | 0.096  | 0.467 | −0.164 | 0.344  |
| Mn–Zn | 0.078  | 0.559 | −0.182 | 0.327  |
| Mo–Na | 0.974  | 0.000 | 0.956  | 0.984  |
| Mo–Ni | −0.036 | 0.788 | −0.289 | 0.222  |
| Mo–Sr | 0.889  | 0.000 | 0.820  | 0.933  |
| Mo–Ti | 0.004  | 0.977 | −0.252 | 0.260  |
| Mo–V  | 0.221  | 0.093 | −0.037 | 0.451  |
| Mo–Zn | 0.201  | 0.127 | −0.058 | 0.435  |
| Na–Ni | −0.029 | 0.830 | −0.283 | 0.229  |
| Na–Sr | 0.893  | 0.000 | 0.826  | 0.935  |
| Na–Ti | −0.022 | 0.868 | −0.277 | 0.235  |
| Na–V  | 0.231  | 0.078 | −0.026 | 0.460  |
| Na–Zn | 0.188  | 0.153 | −0.071 | 0.424  |
| Ni–Sr | −0.262 | 0.045 | −0.485 | −0.006 |
| Ni–Ti | 0.098  | 0.460 | −0.162 | 0.345  |
| Ni–V  | 0.298  | 0.022 | 0.046  | 0.515  |
| Ni–Zn | 0.068  | 0.609 | −0.192 | 0.318  |
| Sr–Ti | −0.071 | 0.595 | −0.321 | 0.189  |
| Sr–V  | 0.117  | 0.378 | −0.144 | 0.362  |
| Sr–Zn | 0.290  | 0.026 | 0.037  | 0.508  |

---

|       |       |       |        |       |
|-------|-------|-------|--------|-------|
| Ti–V  | 0.114 | 0.388 | −0.146 | 0.360 |
| Ti–Zn | 0.237 | 0.070 | −0.020 | 0.465 |
| V–Zn  | 0.149 | 0.260 | −0.111 | 0.390 |
